# Supplementary material for: Safety and efficacy of atezolizumab plus bevacizumab in elderly patients with hepatocellular carcinoma: A multicenter analysis
Source: PubMed Central journal article supplement (PMC9582693; doi:10.1002/cam4.4763), 2022-04-19
Supplement: CAM4-11-3796-s001.pdf [file CAM4-11-3796-s001.pdf]

**Supplementary table 1. Characteristics of patients who received Atez/Bev as first-line systemic therapy (n=179)**

|                                                                     | <b>Elderly patients<br/>(n=80)</b> | <b>Non-elderly patients<br/>(n=99)</b> | <b>p value</b> |
|---------------------------------------------------------------------|------------------------------------|----------------------------------------|----------------|
| Age* (years)                                                        | 81.0 (77.0–84.0)                   | 68.0 (62.0–71.0)                       | <0.001         |
| Sex (female/male)                                                   | 26/54                              | 15/84                                  | 0.007          |
| ECOG-PS (0/1/2/3/4)                                                 | 58/17/4/1/0                        | 85/9/4/0/1                             | 0.061          |
| Body mass index (kg/m <sup>2</sup> )                                | 23.3 (21.1–25.3)                   | 23.9 (21.3–26.8)                       | 0.146          |
| Etiology of HCC (hepatitis B/C/non-B, non-C)                        | 7/34/39                            | 21/28/50                               | 0.031          |
| Aspartate aminotransferase (IU/L)                                   | 36 (27–57)                         | 36 (26–58)                             | 0.979          |
| Alanine aminotransferase (IU/L)                                     | 26 (17–38)                         | 31 (20–43)                             | 0.081          |
| Albumin (g/dL)*                                                     | 3.8 (3.5–4.1)                      | 3.8 (3.4–4.1)                          | 0.810          |
| Total bilirubin (mg/dL)*                                            | 0.7 (0.6–1.0)                      | 0.8 (0.6–1.1)                          | 0.417          |
| Platelet count (×10 <sup>3</sup> /m <sup>3</sup> ) *                | 13.0 (10.7–17.3)                   | 13.0 (9.8–20.3)                        | 0.943          |
| Prothrombin time (%)*                                               | 88 (83–98)                         | 89 (78–97)                             | 0.229          |
| Estimated glomerular filtration rate (mL/min/1.73 m <sup>2</sup> )* | 58.1 (47.2–72.2)                   | 72.5 (59.0–83.8)                       | <0.001         |
| α-fetoprotein (ng/mL)*                                              | 36.6 (7.2–542.0)                   | 20.0 (5.7–293.8)                       | 0.633          |
| Child-Pugh class (A/B/C)                                            | 76/4/0                             | 92/6/1                                 | 1.000          |
| BCLC stage (A/B/C/D)                                                | 10/37/31/2                         | 8/35/54/2                              | 0.190          |
| Follow-up duration* (months)                                        | 3.8 (2.0–6.7)                      | 5.3 (3.1–8.2)                          | 0.028          |
| Deaths                                                              | 7                                  | 9                                      | 1.000          |
| Causes of death (liver-related/ non–liver-related diseases)         | 5/2                                | 9/0                                    | 0.175          |

\*Data are expressed as medians (interquartile range).

Atez/Bev, atezolizumab plus bevacizumab; ECOG-PS, Eastern Cooperative Oncology Group Performance Status; HCC, hepatocellular carcinoma; BCLC, Barcelona Clinic Liver Cancer.
